# Supplementary material for: City-level vulnerability to temperature-related mortality in the USA and future projections: a geographically clustered meta-regression
Source: PubMed Central journal article supplement — Lancet Planet Health. Author manuscript; Available in PMC 2022 Aug 29. (PMC9422466; doi:10.1016/s2542-5196(21)00058-9), 2021-05-20

# THE LANCET

## Planetary Health

### Supplementary appendix

This appendix formed part of the original submission and has been peer reviewed. We post it as supplied by the authors.

Supplement to: Lay CR, Sarofim MC, Vodonos Zilberg A, et al. City-level vulnerability to temperature-related mortality in the USA and future projections: a geographically clustered meta-regression. *Lancet Planet Health* 2021; published online May 19. [http://dx.doi.org/10.1016/S2542-5196\(21\)00058-9](http://dx.doi.org/10.1016/S2542-5196(21)00058-9).

**Supplemental Information**

**Adaptive Human Health Heat-Mortality Behavior in the United States**

**Lay et al.**

### **Detailed methods for exposure response function (ERF) fitting**

To quantify trends in adaptation over time, we fit ERFs separately in four time periods (1973-1982, 1983-1992, 1993-2002, and 2003-2013). The regressions defining the ERFs included terms for both the daily (lag 0) and the five-day moving average (MA15) of daily mean temperature. We used daily mean temperature rather than a relative scale of percentiles that encompassed all locations to aid in projections using modeled temperatures from GCM. We chose MA15 for concordance with a previous study (Nordio et al. 2015), and to reduce the complexity of the model and improve power. MA15 generally captures cold-related mortality (Braga et al. 2002, Nordio et al. 2015), while lag 0 generally captures heat effects (e.g., Vicedo-Cabrera et al. 2019). However, since heat waves over several days can also result in increased mortality, MA15 was included as a predictor across the range of temperatures. We performed this analysis in two stages (Nordio et al. 2015), to produce meta-smoothed spline coefficients for mortality due to lag 0 ( $\beta_{t0}$ ) and MA15 ( $\beta_{t5}$ ) temperatures for each cluster and time period.

In the first stage, we identified appropriate knot locations for each temperature term (lag 0 and MA15) within each cluster as follows. For each city ( $i$ ) in each time period ( $p$ ), we fit two over-dispersed Poisson (quasi-Poisson) generalized additive models (GAMs) to determine the exposure-response functions (ERFs) for temperature and mortality (Equations S-1 and S-2):

$$\log(\mu_t) = \beta_0 + \beta_w DOW_t + \beta_s ns(time_t, 6) + \beta_{t0} bs(T_{lag0}, 2) + \varepsilon_t \quad (S-1)$$

$$\log(\mu_t) = \beta_0 + \beta_w DOW_t + \beta_s ns(time_t, 6) + \beta_{t5} bs(T_{MA15}, 2) + \varepsilon_t \quad (S-2)$$

Where  $DOW_t$  is a factor representing day of the week; and  $ns(time_t, 6)$  is a natural spline representing the day within the modeled time period, which has knots positioned at two-month intervals to represent seasonal variation as well as changes in overall mortality over the time period.  $\beta_0$  is the intercept and the other  $\beta$ s represent the regression coefficients for each associated term. We fit all regressions using *dlnm* (Gasparrini 2011) in R (R Core Team 2019).

Both temperature terms ( $T_{lag0}$  and  $T_{MA15}$ ) were modeled as basis splines ( $bs$ ) with two degrees of freedom containing  $k$  total knots,  $k-2$  interior knots, and two boundary knots. We centered the splines for both terms at  $15.6^\circ\text{C}$  (Anderson and Bell 2009). Boundary knots represented the mean of the range of temperatures observed in all cities within a cluster and period. We determined the number and location of interior knots for each cluster and time period by fitting models with knots at varying percentiles from 5 to 95, and compared the quasi-likelihood based on Akaike's Information Criterion (Q-AIC) for each model for all cities in the clusters (Peng et al. 2006). Interior knot locations are thus the same among cities within the same cluster and time period, but are different among clusters.

In the second stage, after identifying the appropriate knot locations for each spline term within each cluster and time period, we fit the final models for each city and time period. The final model contained both the  $T_{lag0}$  and  $T_{MA15}$  terms. We then combined city-specific estimates for heat-related mortality in each time period into cluster-level estimates through meta-smoothing with the *mvmeta* package (Gasparrini et al. 2012, Nordio et al. 2015, Equation S-3):

$$\log(\mu_t) = \beta_0 + \beta_w DOW_t + \beta_s ns(time_t, 6) + \beta_{t0} bs(T_{lag0}, 2) + \beta_{t5} bs(T_{MA15}, 2) + \varepsilon_t \quad (S-3)$$

This resulted in meta-smoothed spline coefficients for mortality due to lag 0 ( $\beta_{t0}$ ) and MA15 ( $\beta_{t5}$ ) temperatures for each cluster in each of the four time periods.

**Table S-1. City composition of clusters\***

| Cluster | Cities              |                       |                       |                    |                       |                     |                    |
|---------|---------------------|-----------------------|-----------------------|--------------------|-----------------------|---------------------|--------------------|
| 1       | ALLENTOWN (PA)      | CARLISLE (PA)         | HARTFORD (CT)         | NEW LONDON (CT)    | PLYMOUTH (MA)         | STAMFORD (CT)       | ..                 |
|         | ANNANDALE (VA)      | DOVER (DE)            | JERSEY CITY (NJ)      | NEW YORK (NY)      | PROVIDENCE (RI)       | TOMS RIVER (NJ)     | ..                 |
|         | ATLANTIC CITY (NJ)  | ELIZABETH (NJ)        | LANCASTER (PA)        | NEWARK (NJ)        | READING (PA)          | TRENTON (NJ)        | ..                 |
|         | BALTIMORE (MD)      | ESSEX (MA)            | MELVILLE (NY)         | NEWBURGH (NY)      | <b>RICHMOND (VA)</b>  | UPPER MARLBORO (MD) | ..                 |
|         | BARNSTABLE (MA)     | GETTYSBURG (PA)       | MIDDLESEX (NJ)        | PATERSON (NJ)      | ROCKVILLE (MD)        | WILMINGTON (DE)     | ..                 |
|         | BOSTON (MA)         | HARRISBURG (PA)       | NEW HAVEN (CT)        | PHILADELPHIA (PA)  | SPRINGFIELD (MA)      | YORK (PA)           | ..                 |
| 2       | AKRON (OH)          | BURLINGTON (VT)       | DETROIT (MI)          | GRAND RAPIDS (MI)  | LOGAN (UT)            | OMAHA (NE)          | STATE COLLEGE (PA) |
|         | ALBANY (NY)         | CANTON (OH)           | ELKHART (IN)          | GREEN BAY (WI)     | MADISON (WI)          | OTTAWA (IL)         | TOLEDO (OH)        |
|         | ANN ARBOR (MI)      | CEDAR RAPIDS (IA)     | ERIE (PA)             | HOLLAND (MI)       | MERCER (PA)           | PORTAGE (IN)        | WORCESTER (MA)     |
|         | BANGOR (ME)         | CHICAGO (IL)          | FARGO (ND)            | IOWA CITY (IA)     | MILWAUKEE (WI)        | PORTLAND (ME)       | YOUNGSTOWN (OH)    |
|         | BATH (NY)           | COLORADO SPRINGS (CO) | FLINT (MI)            | KALAMAZOO (MI)     | MINNEAPOLIS (MN)      | ROCHESTER (NY)      | ..                 |
|         | BEAVER DAM (WI)     | DAVENPORT (IA)        | FORT WAYNE (IN)       | KENOSHA (WI)       | MUSKEGON (MI)         | SCRANTON (PA)       | ..                 |
|         | BOULDER (CO)        | DENVER (CO)           | GARY (IN)             | LA PORTE (IN)      | NASHUA (NH)           | SIOUX CITY (IA)     | ..                 |
|         | BUFFALO (NY)        | DES MOINES (IA)       | GRAND HAVEN (MI)      | LANSING (MI)       | NILES (MI)            | SOUTH BEND (IN)     | ..                 |
| 3       | CHARLESTON (WV)     | DAYTON (OH)           | INDIANAPOLIS (IN)     | MADISON (IL)       | SPRINGFIELD (MO)      | TERRE HAUTE (IN)    | WICHITA (KS)       |
|         | CINCINNATI (OH)     | EAST ST. LOUIS (IL)   | KANSAS CITY (KS)      | MIDDLETOWN (OH)    | ST. CHARLES (MO)      | TOPEKA (KS)         | ..                 |
|         | CLEVELAND (OH)      | EVANSVILLE (IN)       | LAFAYETTE (IN)        | MUNCIE (IN)        | <b>ST. LOUIS (MO)</b> | WASHINGTON (DC)     | ..                 |
|         | COLUMBUS (OH)       | GREENSBURG (PA)       | LOUISVILLE (KY)       | PITTSBURGH (PA)    | STEUBENVILLE (OH)     | WASHINGTON (PA)     | ..                 |
| 4       | ATLANTA (GA)        | CHARLOTTE (NC)        | DURHAM (NC)           | GREENVILLE (SC)    | MACON (GA)            | NASHVILLE (TN)      | SPARTANBURG (SC)   |
|         | AUGUSTA (GA)        | CHATTANOOGA (TN)      | FAYETTEVILLE (NC)     | HICKORY (NC)       | MEMPHIS (TN)          | <b>NORFOLK (VA)</b> | TULSA (OK)         |
|         | BIRMINGHAM (AL)     | COLUMBIA (SC)         | FORT WORTH (TX)       | KNOXVILLE (TN)     | MONROE (LA)           | OKLAHOMA CITY (OK)  | WINSTON-SALEM (NC) |
|         | CHARLESTON (SC)     | DALLAS (TX)           | GREENSBORO (NC)       | LITTLE ROCK (AR)   | MYRTLE BEACH (SC)     | RALEIGH (NC)        | ..                 |
| 5       | ANAHEIM (CA)        | LOS ANGELES (CA)      | RIVERSIDE (CA)        | SAN FRANCISCO (CA) | STOCKTON (CA)         | VENTURA (CA)        | ..                 |
|         | EUGENE (OR)         | OAKLAND (CA)          | SACRAMENTO (CA)       | SAN JOSE (CA)      | TACOMA (WA)           | ..                  | ..                 |
|         | EVERETT (WA)        | PORTLAND (OR)         | SAN DIEGO (CA)        | SEATTLE (WA)       | VANCOUVER (WA)        | ..                  | ..                 |
| 6       | AUSTIN (TX)         | HOUSTON (TX)          | LAKE CHARLES (LA)     | NEW ORLEANS (LA)   | PORT ARTHUR (TX)      | ..                  | ..                 |
|         | BATON ROUGE (LA)    | JACKSONVILLE (FL)     | MOBILE (AL)           | Ocala (FL)         | SAN ANTONIO (TX)      | ..                  | ..                 |
|         | GAINESVILLE (FL)    | LAFAYETTE (LA)        | MONTGOMERY (AL)       | PENSACOLA (FL)     | TALLAHASSEE (FL)      | ..                  | ..                 |
| 7       | BROWNSVILLE (TX)    | FORT LAUDERDALE (FL)  | LAKELAND (FL)         | MIAMI (FL)         | SARASOTA (FL)         | ..                  | ..                 |
|         | CORPUS CHRISTI (TX) | FORT MYERS (FL)       | MCALLEN (TX)          | ORLANDO (FL)       | ST. PETERSBURG (FL)   | ..                  | ..                 |
|         | DAYTONA BEACH (FL)  | FORT PIERCE (FL)      | MELBOURNE (FL)        | PALM BEACH (FL)    | TAMPA (FL)            | ..                  | ..                 |
| 8       | BAKERSFIELD (CA)    | EL PASO (TX)          | <b>LAS VEGAS (NV)</b> | PHOENIX (AZ)       | VISALIA (CA)          | ..                  | ..                 |

| Cluster                                                                                                                                                                                                                                                                                              | Cities           |                     |                    |              |            |                     |              |
|------------------------------------------------------------------------------------------------------------------------------------------------------------------------------------------------------------------------------------------------------------------------------------------------------|------------------|---------------------|--------------------|--------------|------------|---------------------|--------------|
|                                                                                                                                                                                                                                                                                                      | EL CENTRO (CA)   | FRESNO (CA)         | MODESTO (CA)       | TUCSON (AZ)  | ..         | ..                  | ..           |
| 9                                                                                                                                                                                                                                                                                                    | ALBUQUERQUE (NM) | BOISE CITY (ID)     | KLAMATH FALLS (OR) | MEDFORD (OR) | OGDEN (UT) | RENO (NV)           | SPOKANE (WA) |
|                                                                                                                                                                                                                                                                                                      | AZTEC (NM)       | GRAND JUNCTION (CO) | LAYTON (UT)        | NAMPA (ID)   | PROVO (UT) | SALT LAKE CITY (UT) | ..           |
| * For 1982 to 1983, the following cities were dropped, as data suggested change in reporting that caused large increase in mortality counts unrelated to an actual change in mortality. Cluster 1: RICHMOND (VA), Cluster 3: ST. LOUIS (MO), Cluster 4: NORFOLK (VA), and Cluster 8: LAS VEGAS (NV). |                  |                     |                    |              |            |                     |              |

**Table S-2. Missing data percentage by cluster and year**

| <b>Cluster</b> | <b>Cities</b> | <b>1973-1982</b> | <b>1983-1992</b> | <b>1993-2002</b> | <b>2003-2013</b> |
|----------------|---------------|------------------|------------------|------------------|------------------|
| 1              | 36            | 2.5%             | 0%               | 1.9%             | 26.3%            |
| 2              | 52            | 0%               | 0%               | 8.1%             | 30.7%            |
| 3              | 24            | 0%               | 0%               | 2.9%             | 24.8%            |
| 4              | 27            | 0%               | 0%               | 0%               | 35.4%            |
| 5              | 17            | 0%               | 0%               | 0%               | 44.3%            |
| 6              | 15            | 0%               | 0%               | 0%               | 49.1%            |
| 7              | 15            | 0%               | 0%               | 0%               | 58.2%            |
| 8              | 9             | 11.1%            | 0%               | 0%               | 44.7%            |
| 9              | 13            | 5.5%             | 0%               | 24.6%            | 45.8%            |

**Table S-3. Cochran's Q, I2, AIC, and BIC from the meta-regression. Decade was treated as a factor with 1993-2003 as the reference period. Models included summer mean temperature (Summer), winter mean temperature (Winter), air conditioning (AC), total population of the largest county in a city in the decade (Population), population aged 65 and over in that count (Age65Up).**

| Cluster | lag  | Model Call                                             | Cochran's Q |     |       | I <sup>2</sup> | AIC   | BIC   |
|---------|------|--------------------------------------------------------|-------------|-----|-------|----------------|-------|-------|
|         |      |                                                        | Q           | df  | p     |                |       |       |
| 1       | lag0 | Intercept                                              | 1197        | 705 | 0.000 | 41.100         | -1630 | -1538 |
| 1       | lag0 | Intercept + Decade                                     | 963         | 690 | 0.000 | 28.368         | -1682 | -1522 |
| 1       | lag0 | Intercept + Summer + Decade + Population + Age65Up     | 851         | 675 | 0.000 | 20.699         | -1728 | -1500 |
| 1       | lag0 | Intercept + Decade + Population + Age65Up              | 949         | 680 | 0.000 | 28.380         | -1670 | -1464 |
| 1       | lag0 | Intercept + Decade + AC + Summer + AC:Summer           | 795         | 675 | 0.001 | 15.074         | -1771 | -1542 |
| 1       | lag0 | Intercept + Decade + AC + Summer                       | 850         | 680 | 0.000 | 19.976         | -1738 | -1532 |
| 1       | MA15 | Intercept                                              | 1108        | 846 | 0.000 | 23.654         | -2097 | -1968 |
| 1       | MA15 | Intercept + Decade                                     | 1009        | 828 | 0.000 | 17.904         | -2115 | -1901 |
| 1       | MA15 | Intercept + Decade + Winter + Population + Age65Up     | 904         | 810 | 0.012 | 10.397         | -2138 | -1839 |
| 1       | MA15 | Intercept + Decade + Population + Age65Up              | 950         | 816 | 0.001 | 14.093         | -2113 | -1842 |
| 2       | lag0 | Intercept                                              | 1223        | 828 | 0.000 | 32.3           | -1417 | -1351 |
| 2       | lag0 | Intercept + Decade                                     | 1054        | 816 | 0.000 | 22.6           | -1474 | -1352 |
| 2       | lag0 | Intercept + Decade + AC + Summer                       | 947         | 808 | 0.001 | 14.6           | -1526 | -1366 |
| 2       | lag0 | Intercept + Decade + AC + Summer + AC:Summer           | 909         | 804 | 0.006 | 11.6           | -1550 | -1371 |
| 2       | lag0 | Intercept + Summer + Decade + Age65Up                  | 953         | 808 | 0.000 | 15.2           | -1526 | -1366 |
| 2       | lag0 | Intercept + Decade + Age65Up                           | 1040        | 812 | 0.000 | 21.9           | -1473 | -1332 |
| 2       | MA15 | Intercept                                              | 1108        | 846 | 0.000 | 23.7           | -2097 | -1969 |
| 2       | MA15 | Intercept + Decade                                     | 1009        | 828 | 0.000 | 17.9           | -2115 | -1901 |
| 2       | MA15 | Intercept + Decade + Summer + Winter + Age65Up         | 913         | 810 | 0.007 | 11.3           | -2130 | -1831 |
| 2       | MA15 | Intercept + Decade + Age65Up                           | 969         | 822 | 0.000 | 15.1           | -2111 | -1869 |
| 2       | MA15 | Intercept + Decade + Winter + Age65Up + Winter:Age65Up | 912         | 810 | 0.007 | 11.2           | -2130 | -1831 |
| 3       | lag0 | Intercept                                              | 565         | 372 | 0.000 | 34.2           | -799  | -744  |
| 3       | lag0 | Intercept + Decade                                     | 475         | 360 | 0.000 | 24.2           | -816  | -713  |
| 3       | lag0 | Intercept + Summer + Decade + Age65Up                  | 411         | 352 | 0.017 | 14.3           | -823  | -690  |
| 3       | lag0 | Intercept + Decade + Age65Up                           | 417         | 356 | 0.014 | 14.7           | -826  | -709  |
| 3       | lag0 | Intercept + Decade + AC + Summer + AC:Summer           | 415         | 348 | 0.008 | 16.1           | -815  | -666  |
| 3       | lag0 | Intercept + Decade + AC + Summer                       | 423         | 352 | 0.006 | 16.7           | -818  | -684  |

| Cluster | lag  | Model Call                                              | Cochran's Q |     |       | I <sup>2</sup> | AIC  | BIC  |
|---------|------|---------------------------------------------------------|-------------|-----|-------|----------------|------|------|
|         |      |                                                         | Q           | df  | p     |                |      |      |
| 3       | MA15 | Intercept                                               | 392         | 372 | 0.231 | 5.0            | -847 | -792 |
| 3       | MA15 | Intercept + Decade                                      | 358         | 360 | 0.526 | 0.0            | -851 | -749 |
| 3       | MA15 | Intercept + Decade + Summer + Winter + Age65Up          | 345         | 348 | 0.537 | 0.0            | -838 | -689 |
| 3       | MA15 | Intercept + Decade + Age65Up                            | 352         | 356 | 0.554 | 0.0            | -848 | -730 |
| 3       | MA15 | Intercept + Decade + Winter + Age65Up + Winter:Age65Up  | 342         | 348 | 0.578 | 0.0            | -841 | -692 |
| 4       | lag0 | Intercept                                               | 577         | 420 | 0.000 | 27.2           | -836 | -779 |
| 4       | lag0 | Intercept + Decade                                      | 501         | 408 | 0.001 | 18.5           | -865 | -759 |
| 4       | lag0 | Intercept + Decade + AC + Summer                        | 477         | 400 | 0.005 | 16.2           | -862 | -725 |
| 4       | lag0 | Intercept + Decade + AC + Summer + AC:Summer            | 474         | 396 | 0.004 | 16.4           | -857 | -703 |
| 4       | lag0 | Intercept + AC + Summer + Decade + Population + Age65Up | 469         | 392 | 0.004 | 16.5           | -852 | -682 |
| 4       | lag0 | Intercept + Decade + AC + Population + Age65Up          | 477         | 396 | 0.003 | 17.0           | -856 | -702 |
| 4       | lag0 | Intercept + Decade + Population + Age65Up               | 488         | 400 | 0.002 | 18.1           | -859 | -721 |
| 4       | MA15 | Intercept                                               | 513         | 420 | 0.001 | 18.1           | -843 | -787 |
| 4       | MA15 | Intercept + Decade                                      | 474         | 408 | 0.014 | 13.9           | -855 | -750 |
| 4       | MA15 | Intercept + Decade + Summer + Winter + AC + Age65Up     | 446         | 392 | 0.032 | 12.0           | -848 | -678 |
| 4       | MA15 | Intercept + Decade + AC + Age65Up                       | 460         | 400 | 0.020 | 13.1           | -851 | -713 |
| 4       | MA15 | Intercept + Decade + Winter + Age65Up + Winter:Age65Up  | 454         | 396 | 0.023 | 12.8           | -848 | -694 |
| 6       | lag0 | Intercept                                               | 332         | 295 | 0.066 | 11.3           | -554 | -480 |
| 6       | lag0 | Intercept + Decade                                      | 301         | 280 | 0.186 | 7.0            | -548 | -418 |
| 6       | lag0 | Intercept + Decade + AC + Summer                        | 292         | 270 | 0.176 | 7.4            | -536 | -370 |
| 6       | lag0 | Intercept + Decade + AC + Summer + AC:Summer            | 285         | 265 | 0.186 | 7.1            | -533 | -348 |
| 6       | lag0 | Intercept + Decade + Summer + Winter + AC               | 278         | 265 | 0.274 | 4.8            | -540 | -354 |
| 6       | lag0 | Intercept + Decade + AC + Population + Age65Up          | 288         | 265 | 0.158 | 8.0            | -528 | -343 |
| 6       | lag0 | Intercept + Decade + Population + Age65Up               | 295         | 270 | 0.139 | 8.6            | -533 | -366 |
| 6       | MA15 | Intercept                                               | 284         | 236 | 0.018 | 16.8           | -433 | -384 |
| 6       | MA15 | Intercept + Decade                                      | 257         | 224 | 0.067 | 12.7           | -425 | -334 |
| 6       | MA15 | Intercept + Decade + Summer + Winter + AC + Age65Up     | 228         | 208 | 0.166 | 8.7            | -417 | -271 |



| Cluster | lag  | Model Call                                                       | Cochran's Q |     |       | I <sup>2</sup> | AIC  | BIC  |
|---------|------|------------------------------------------------------------------|-------------|-----|-------|----------------|------|------|
|         |      |                                                                  | Q           | df  | p     |                |      |      |
| 6       | MA15 | Intercept + Decade + Summer + Winter + AC                        | 235         | 212 | 0.134 | 9.8            | -420 | -288 |
| 6       | MA15 | Intercept + Decade + AC                                          | 245         | 220 | 0.122 | 10.1           | -428 | -324 |
| 6       | MA15 | Intercept + Decade + Winter + Age65Up + Winter:Age65Up           | 235         | 212 | 0.137 | 9.6            | -418 | -286 |
| 7       | lag0 | Intercept                                                        | 275         | 236 | 0.040 | 14.3           | -566 | -517 |
| 7       | lag0 | Intercept + Decade                                               | 243         | 224 | 0.185 | 7.8            | -569 | -478 |
| 7       | lag0 | Intercept + AC + Summer + Decade + Population + Age65Up          | 218         | 208 | 0.304 | 4.6            | -560 | -414 |
| 7       | lag0 | Intercept + Decade + AC + Summer + AC:Summer                     | 220         | 212 | 0.344 | 3.5            | -566 | -434 |
| 7       | lag0 | Intercept + Summer + Decade + AC                                 | 224         | 216 | 0.341 | 3.6            | -570 | -452 |
| 7       | lag0 | Intercept + Decade + AC                                          | 237         | 220 | 0.201 | 7.3            | -566 | -461 |
| 7       | lag0 | Intercept + Decade + Population + Age65Up                        | 235         | 216 | 0.173 | 8.3            | -560 | -442 |
| 7       | MA15 | Intercept                                                        | 299         | 236 | 0.003 | 21.0           | -538 | -490 |
| 7       | MA15 | Intercept + Decade                                               | 266         | 224 | 0.027 | 15.9           | -536 | -445 |
| 7       | MA15 | Intercept + Decade + Summer + Winter + AC + Population + Age65Up | 236         | 204 | 0.060 | 13.6           | -521 | -361 |
| 7       | MA15 | Intercept + Decade + Summer + Winter                             | 242         | 216 | 0.108 | 10.8           | -540 | -422 |
| 7       | MA15 | Intercept + Decade + AC                                          | 265         | 220 | 0.020 | 17.1           | -528 | -424 |
| 7       | MA15 | Intercept + Decade + AC + Age65Up + AC:Age65Up                   | 250         | 212 | 0.036 | 15.4           | -525 | -393 |
| 9       | lag0 | Intercept                                                        | 199         | 204 | 0.593 | 0.0            | -213 | -167 |
| 9       | lag0 | Intercept + Decade                                               | 182         | 192 | 0.688 | 0.0            | -203 | -116 |
| 9       | lag0 | Intercept + AC + Summer + Decade + Population + Age65Up          | 218         | 208 | 0.304 | 4.6            | -560 | -414 |
| 9       | lag0 | Intercept + Decade + AC + Summer + AC:Summer                     | 285         | 265 | 0.186 | 7.1            | -533 | -348 |
| 9       | lag0 | Intercept + Decade + AC + Summer + Winter + Population + Age65Up | 146         | 172 | 0.924 | 0.0            | -196 | -43  |
| 9       | lag0 | Intercept + Decade + Summer + Winter                             | 157         | 184 | 0.922 | 0.0            | -210 | -96  |
| 9       | lag0 | Intercept + Decade + AC                                          | 178         | 188 | 0.683 | 0.0            | -198 | -98  |
| 9       | lag0 | Intercept + Decade + Population + Age65Up                        | 168         | 184 | 0.802 | 0.0            | -199 | -85  |
| 9       | MA15 | Intercept                                                        | 172         | 204 | 0.951 | 0.0            | -213 | -166 |
| 9       | MA15 | Intercept + Decade                                               | 161         | 192 | 0.951 | 0.0            | -199 | -112 |
| 9       | MA15 | Intercept + Decade + Summer + Winter + Population + Age65Up      | 148         | 176 | 0.942 | 0.0            | -180 | -40  |
| 9       | MA15 | Intercept + Decade + Summer + Winter                             | 151         | 184 | 0.963 | 0.0            | -193 | -79  |
| 9       | MA15 | Intercept + Decade + AC                                          | 158         | 188 | 0.943 | 0.0            | -193 | -93  |
| 9       | MA15 | Intercept + Decade + Winter + Age65Up + Winter:Age65Up           | 153         | 180 | 0.929 | 0.0            | -183 | -56  |

**Table S-4. Central year of 11-year time periods anticipated to have average U.S. temperature increases of 1-6°C over temperature in the baseline period (1986-2005), and the range of years over which change is projected to occur. Not all climate models project a 4°C, 5°C, and 6°C change before the end of the century. Arrival times would be different for alternative RCPs.**

| GCM (RCP 8.5)                | 1°C       | 2°C       | 3°C       | 4°C       | 5°C       | 6°C       |
|------------------------------|-----------|-----------|-----------|-----------|-----------|-----------|
| CanESM2                      | 2011      | 2033      | 2048      | 2062      | 2076      | 2091      |
| CCSM4                        | 2011      | 2037      | 2059      | 2077      | 2091      | ..        |
| GISS E2 R                    | 2025      | 2052      | 2082      | ..        | ..        | ..        |
| HadGEM2 ES                   | 2013      | 2029      | 2044      | 2055      | 2064      | 2077      |
| MIROC5                       | 2017      | 2033      | 2050      | 2067      | 2081      | ..        |
| GFDL CM3                     | 2013      | 2032      | 2049      | 2061      | 2071      | 2087      |
| Year Range (not centralized) | 2006-2030 | 2027-2057 | 2039-2087 | 2050-2084 | 2059-2096 | 2072-2096 |

**Figure S-1. Risk attributable to temperature centered at average daily temperature for each city from the 2003-2013 hindcast. The red dots represent mortality attributable to lag 0 temperature, the blue dots represent mortality attributable to MA15 temperature, and the violet dots represent the sum of the two.**

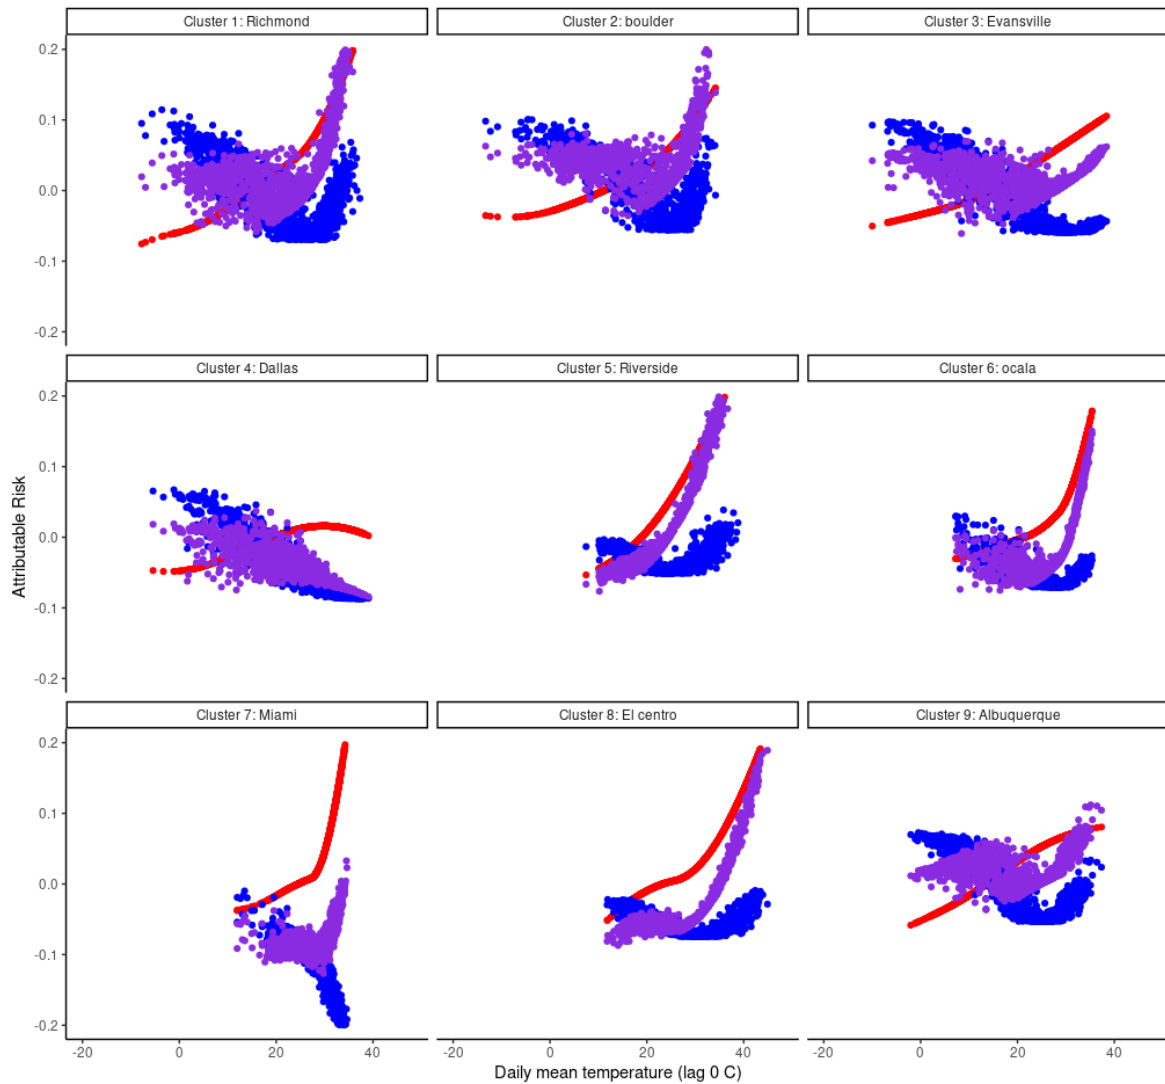

**Figure S-2. Comparison of risk attributable to temperature for Cluster 1 at  $1\Delta^{\circ}\text{C}$  and  $6\Delta^{\circ}\text{C}$ . Warmer daily temperatures associated with warmer five-day moving average temperatures are associated with the highest risks for most clusters, but in Cluster 4, these produce the lowest risks.**

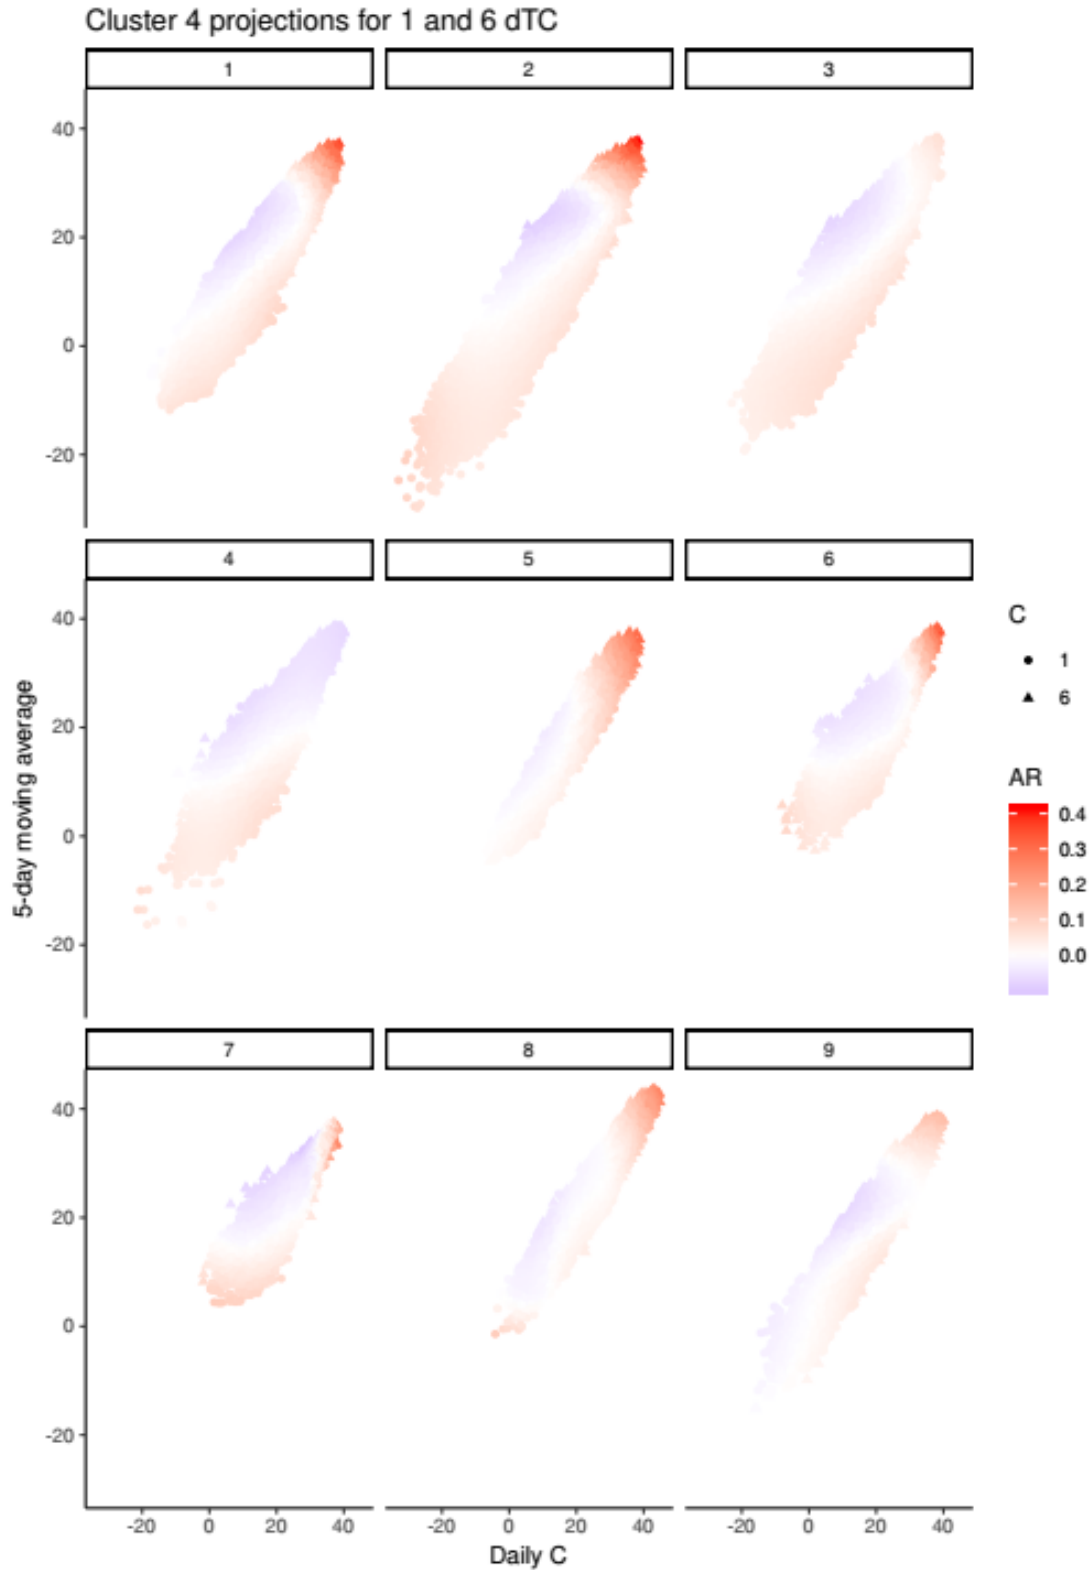

**Figure S-3. ERF of relative risk for each cluster and temperature lag term, with curves centered at 15·6°C. The response to temperature changed over time for both lag 0 and MA15 ERFs.**

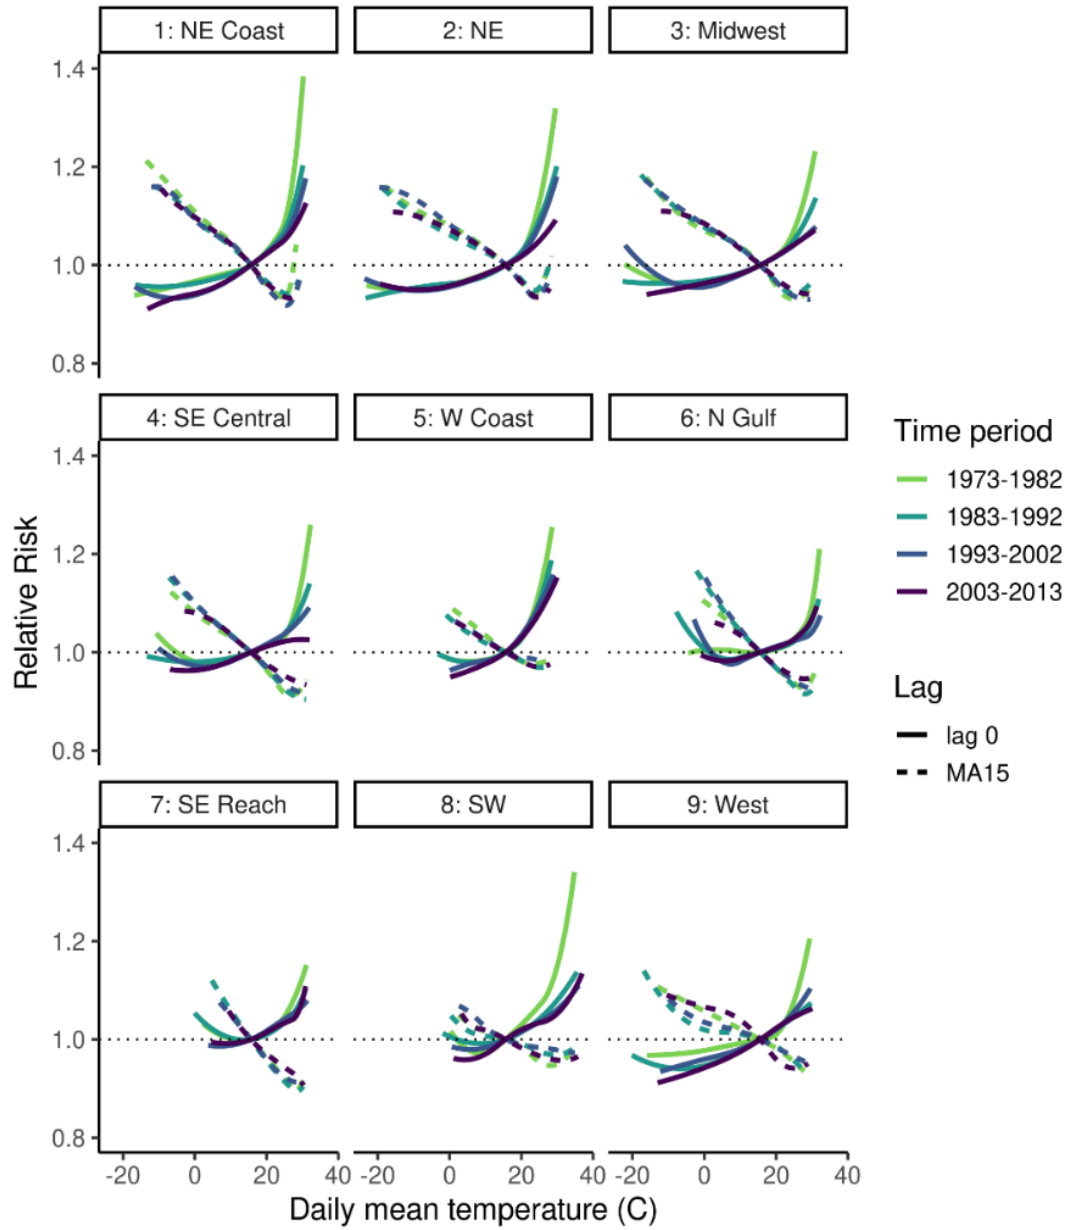

**Figures S-4. Change in attributable death relative to hindcast at  $4\Delta^{\circ}\text{C}$  per 100,000 of 2010 population shown in relationship to temperature categories. “Coldest” temperatures are below the lowest bound for each cluster, “cold” temperatures are between the lowest bound and the lowest interior knot, “mid” temperatures are between the lowest and highest interior knots, “hot” temperatures are between the highest interior knot and the highest bound, and the “hottest” temperatures are above the highest bound. AN was calculated from the fitted splines from each historical time period. The effect of heat on increasing mortality is greatly reduced in 2003-2013 compared to earlier time periods.**

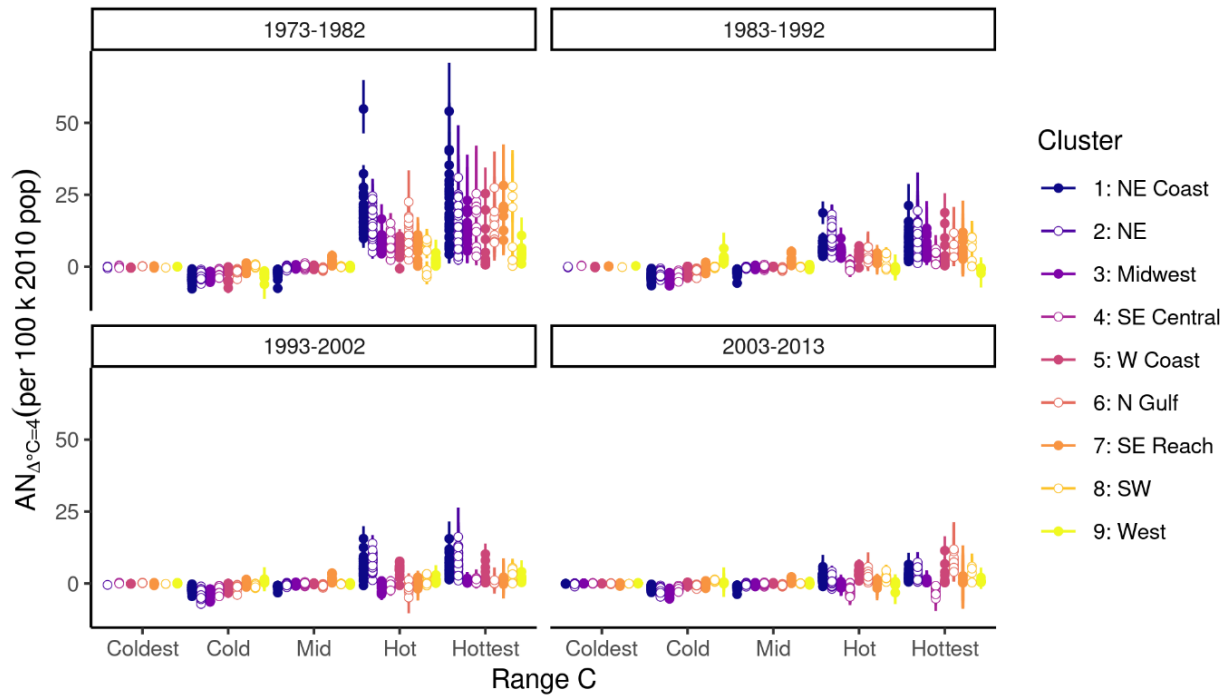

**Figure S-5. Total change in attributable death relative to hindcast per 100,000 of 2010 population over a year by the historical period of fitted model at 3°ΔC (left) and 6°ΔC (right). Points represent the central estimate for each of the 208 cities, and whiskers represent the 66% confidence interval around those estimates.**

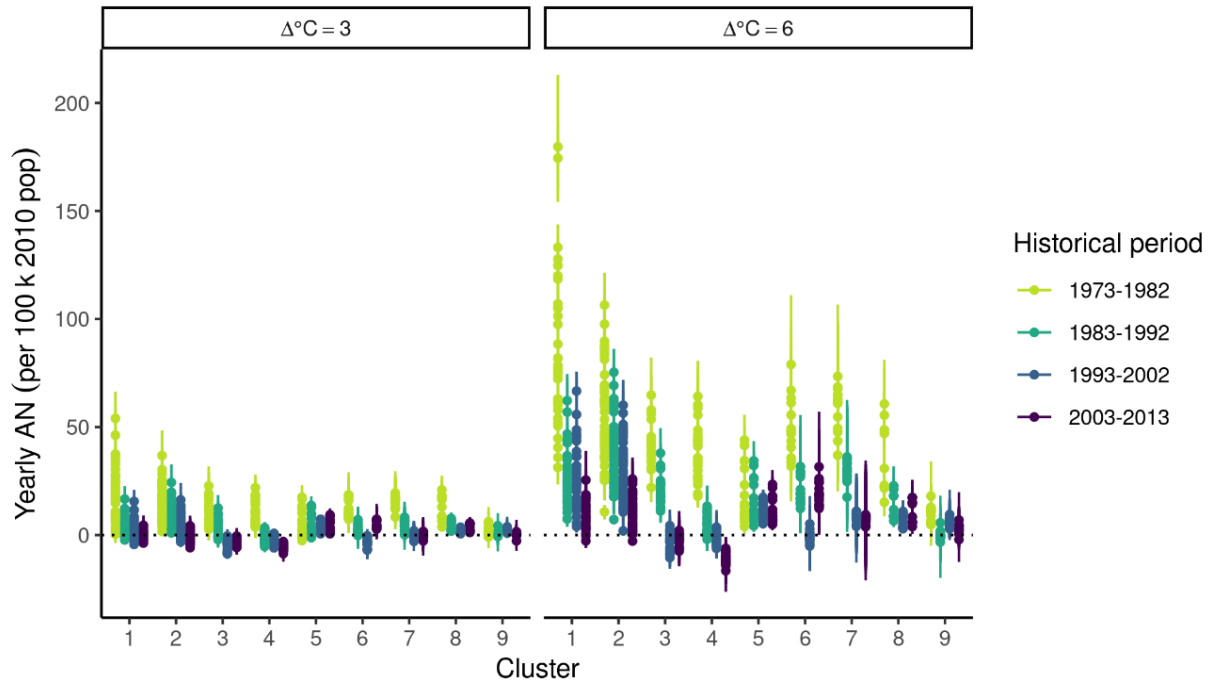

**Figure S-6. Change in attributable mortality due to temperature, relative to 2010 population (per 100,000), shown by time period of historical data and cluster. Clusters 9 and 5 show relatively little evidence of adaptation compared to the other clusters.**

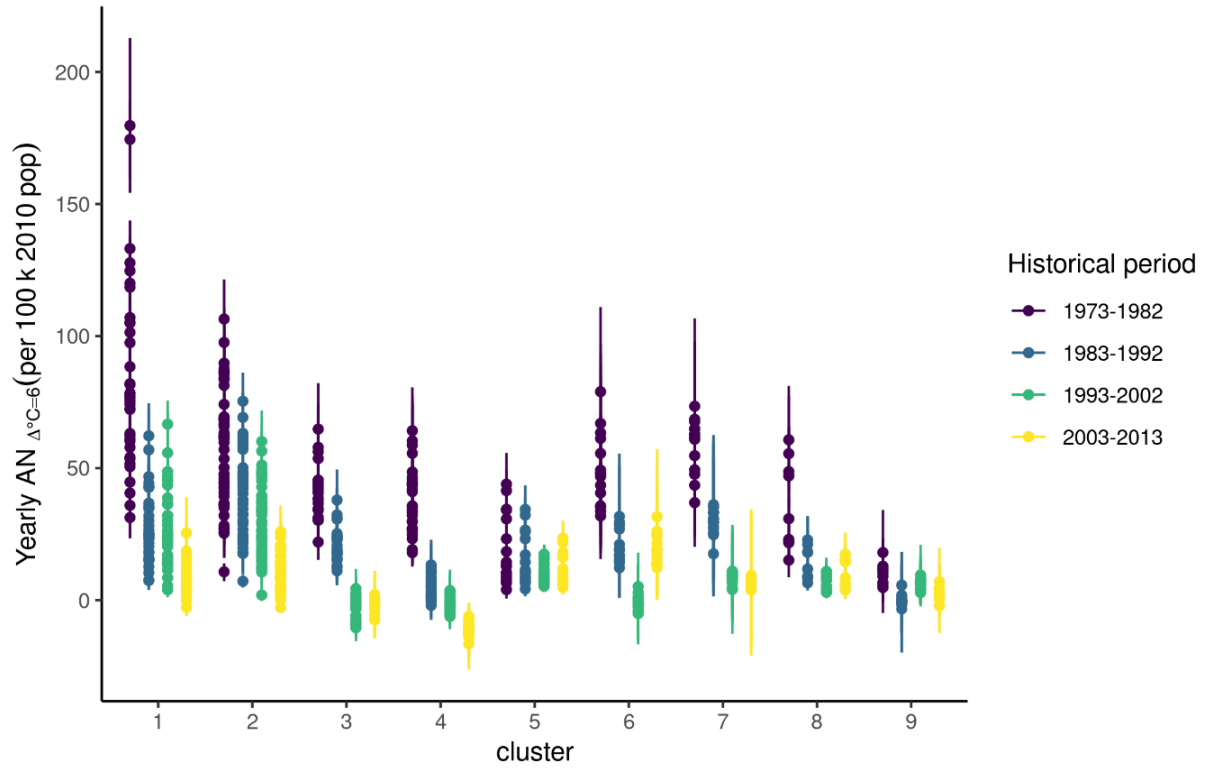



**Figure S-7. Winter differences in attributable risk at 3°C change. Winter risk differs little from the hindcast overall, and, as expected, any differences do not appear related to air conditioning in the historical period in which the ERF was fit.**

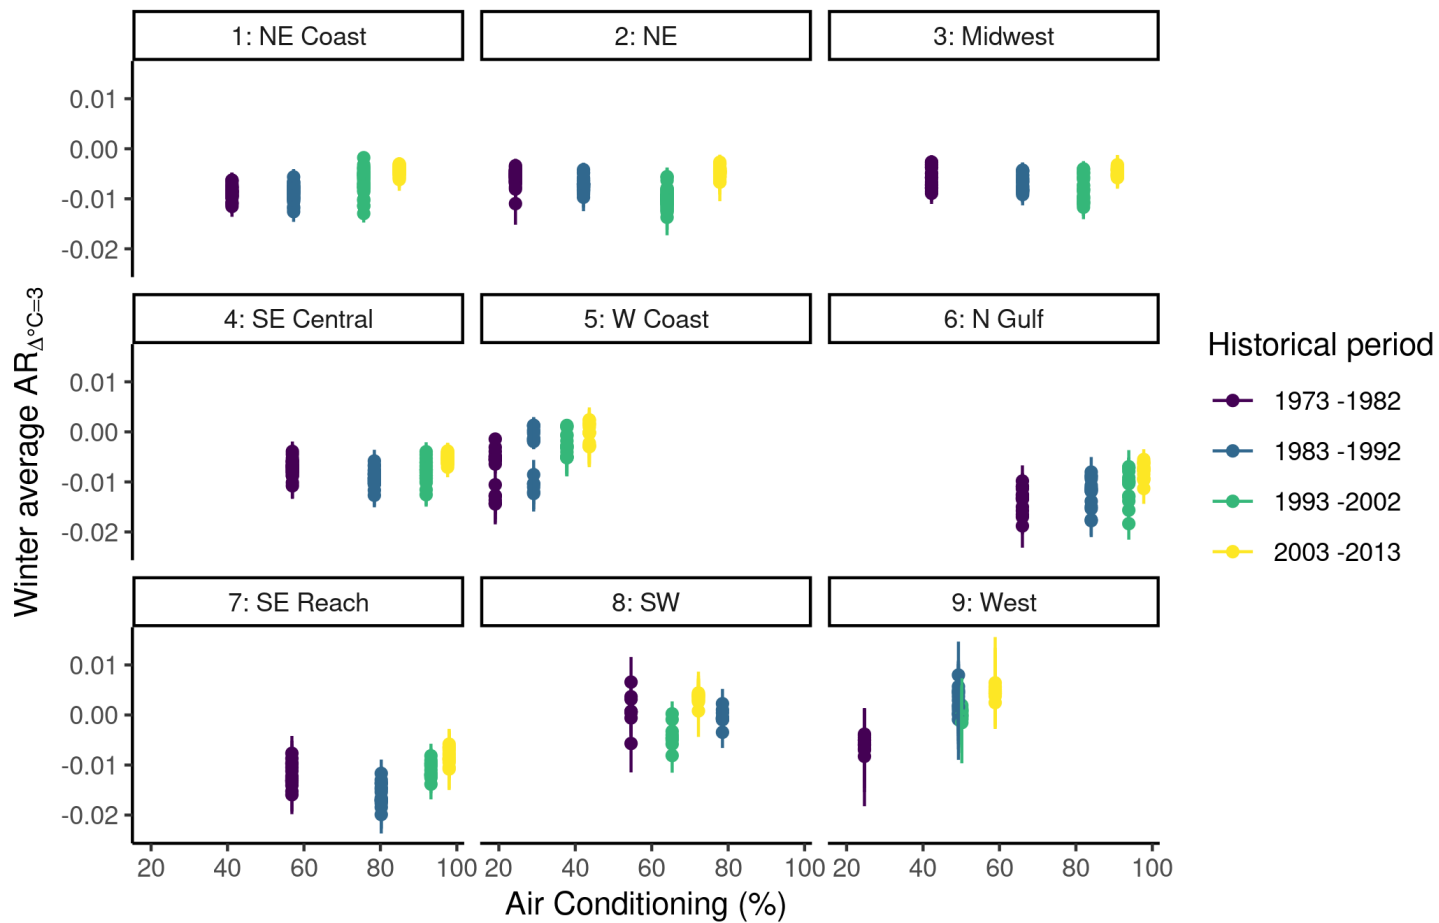

**Figure S-8. Differences in attributable mortality at 3°C, shown by the population 65 and over and summer mean temperature in the historical period in which ERFs in the projections were fitted. Although a slight reduction in summer mortality is apparent even as the population over age 65 increases, the causal factor is more likely concurrent changes in air conditioning or other measures that reduce vulnerability.**

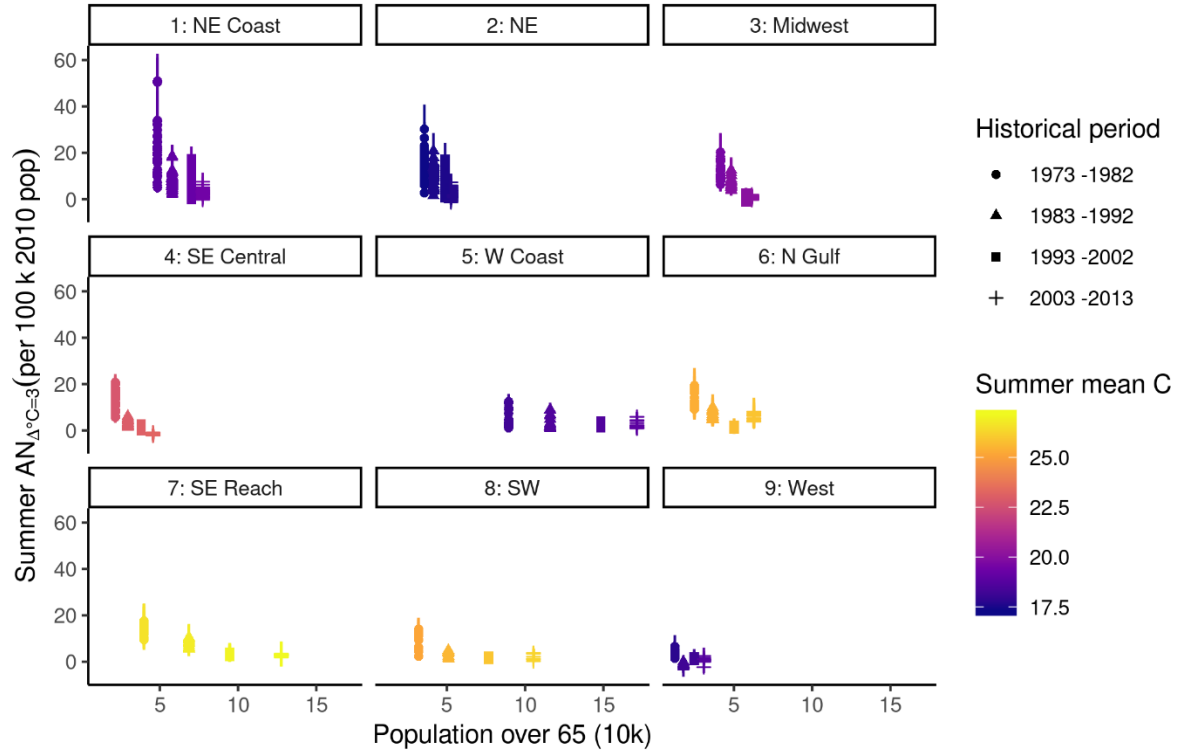

**Figure S-9. Projected change in AN at 3°C for each cluster showing the population age 65 or older (per 100,000), and mean winter temperature for the historical period in which the ERFs were fitted.**

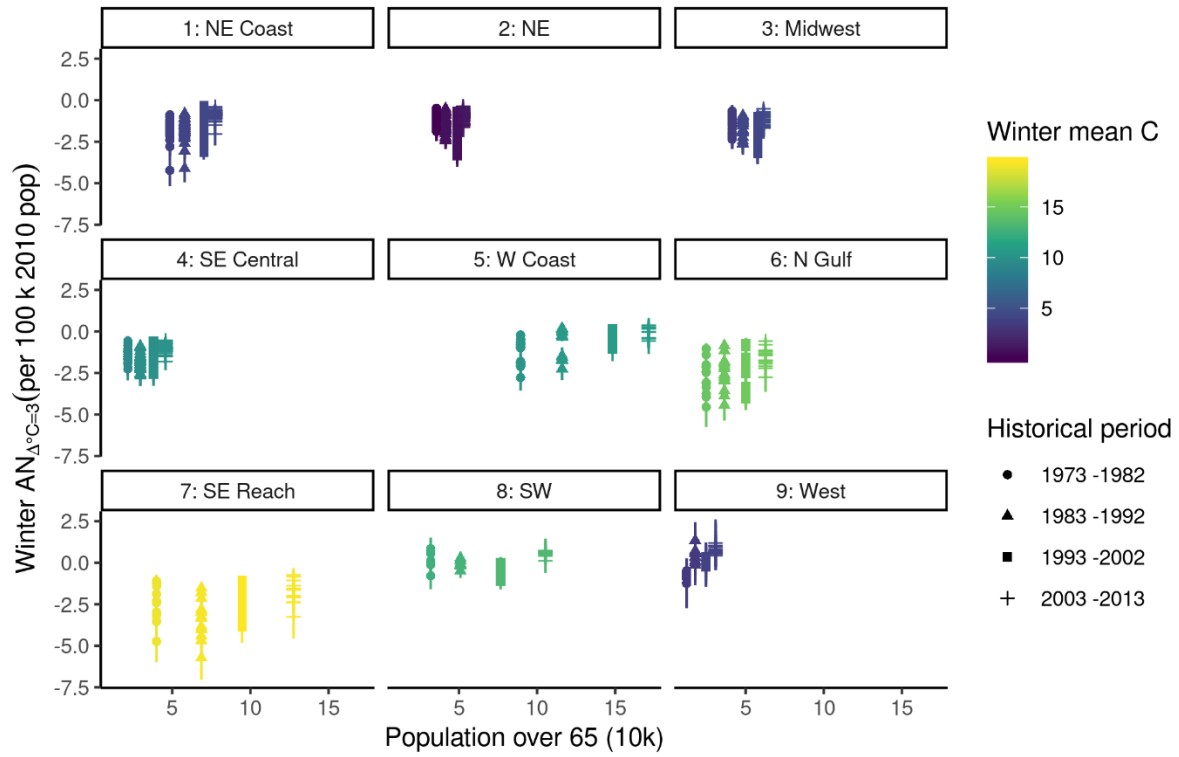

Supplement: NIHMS1832415-supplement-lay2021_SI_pdf.pdf [file NIHMS1832415-supplement-lay2021_SI_pdf.pdf]
